# Supplementary material
Source: Elsevier journal article supplement (https://www.sciencedirect.com/science/article/pii/S2173574321001593)
Supplement: mmc1 [file S2173574321001593:mmc1.docx]

ANNEX 1

IMPACTAR Steering Comittee

1. Rolando Espinosa Morales, MD
2. Jorge Antonio Esquivel-Valerio, MD
3. Alejandro Díaz-Borjón, MD
4. Jorge Antonio Aldrete Velasco, MD
5. César Alejandro Arce Salinas, MD
6. Salvador Óscar Rivero Boschert, MD
7. José Fernando Torres Roldán, MD
8. José Manuel Aguilera Zepeda,

MD Scientific Committe

1. David Vega Morales, MD
2. Everardo Álvarez Hernández, MD
3. Víctor Toledo Infanson, MD
4. Ernesto Alcántar Luna, MD
5. Ignacio Cardona Muñoz, MD
6. Felipe Gómez García, MD
7. José Luis Martínez Hernández, MD
8. Gilberto Meza Reyes, MD
9. Jesús Ojino Sosa García, MD
10. Alfredo Penagos Paniagua, MD
11. María Azucena Ramos Sánchez, MD
12. Mario Salazar Páramo, MD

IMPACTAR Investigators

1. Leonor A. Barile Fabris, MD
2. Gustavo Miguel Azcona Arteaga, MD
3. René Alejandro Barragán Estrada, MD
4. Guillermo Castelló Cerecer, MD
5. Emilio W. Bitar Alatorre, MD
6. Homero García Ávila, MD
7. Sergio García Belmonte, MD
8. Leonardo Bonilla Castillo, MD
9. José Luis González Aguilar, MD
10. Fernando Guevara Ayon, MD
11. Pedro Lomelí Jaime, MD
12. David Marcial Barba, MD
13. Marco Martínez Martínez, MD
14. Leopoldo Moncayo, MD
15. Gustavo Antonio Moye Elizalde, MD
16. Roberto Negrete López, MD
17. Juan Elmer Olguín Redes, MD
18. Carlos Eduardo Orozco Villaseñor, MD
19. Carlos Abelardo Pichardo De la Rosa, MD
20. Luis Enrique de Jesús Ramírez Huerta, MD
21. Oscar Ramírez Macías, MD
22. Pedro Rodríguez Henriquez, MD
23. Pablo Sandoval Sandoval, MD
24. Eduardo David Valdez González, MD
25. Omar Adolfo Villarreal Domínguez, MD
